# Supplementary material for: De novo genome assembly, annotation, and characterization of chemosensory genes in the camel ked (Hippobosca camelina)
Source: Research Square preprint supplement (doi:10.21203/rs.3.rs-6505113/v1), 2025-05-12
Supplement: Supplementary file 1 [file 80634669b688b47dfc03b953.docx]

**Supplementary Tables and Figures**

**Table 2: H. camelina male masked repeat elements statistics.**

| **Element** | **Number of elements** | **Length**  **(Base Pairs)** | **Percentage of sequence** |
| --- | --- | --- | --- |
| Retroelements | 3325 | 817445 | 0.61% |
| DNA transposons | 4115 | 630826 | 0.47% |
| Rolling-circles | 1192 | 780449 | 0.59% |
| Unclassified | 29277 | 4373865 | 3.28% |
| **Total interspersed repeats** |  | **5822136** | **4.37%** |
| Small RNA | 0 | 0 | 0.00% |
| Satellites | 3 | 2167 | 0.00% |
| Simple repeats | 215998 | 11609812 | 8.71% |
| Low complexity | 41441 | 2291285 | 1.72% |
| **Total** | **295,351** | **20,505,849** | **15.38%** |

The element column shows the type of repeat present in the genome. The column, number of elements, shows the count of each element in the genome. Length occupied shows the total number of nucleotide base pairs the element type covers in the draft genome. The percentage of sequence shows the proportion of the whole genome that the elements occupy.

Table 3: *H. camelina* female masked repeat elements statistics.

| **Element** | **Number of elements** | **Length**  **(Base Pairs)** | **Percentage of sequence** |
| --- | --- | --- | --- |
| Retroelements | 3719 | 854696 | 0.63% |
| DNA transposons | 1216 | 171403 | 0.12% |
| Rolling-circles | 1512 | 1732490 | 1.28% |
| Unclassified | 29956 | 5115612 | 3.77% |
| **Total interspersed repeats** |  | **5822136** | **5.8%** |
| Small RNA | 276 | 159118 | 0.12% |
| Satellites | 293 | **124304** | 0.09% |
| Simple repeats | 209141 | 12767461 | 9.42% |
| Low complexity | 39484 | 2232675 | 1.65% |
| **Total** | **295,351** | **23,157,759** | **17.08%** |

The element column shows the type of repeat present in the genome. The column, for the number of elements shows the count of each element in the genome. Length occupied shows the total number of nucleotide base pairs the element type occupies in the draft genome. The percentage of sequence shows the proportion of the whole genome that the elements occupy.

**Table 4: Summary of Chemosensory Specific Proteins (CSP)**

| **Gene name** | **Contig** | **Start** | **End** | **Strand** | **Exons** | **Length(aa)** | **GenBank**  **Accession** |
| --- | --- | --- | --- | --- | --- | --- | --- |
| HcamCSP2 | contig_147 | 1803349 | 1803901 | **-** | 2 | 162 | PV030410 |
| HcamCSP3 | contig_1820 | 467114 | 468275 | **+** | 2 | 129 | PV030411 |
| HcamCSP1 | contig_142 | 353708 | 354100 | **+** | 1 | 131 | PV030409 |
| HcamCSP4 | contig_142 | 345323 | 346435 | **-** | 2 | 113 | PV030408 |

Gene name represents the identifier assigned based on the evolutionary order among the *H. camelina* CSPs genes. Length (aa) indicates the number of amino acids in the protein encoded by the gene. Contig, refers to the genomic location or sequence identifier where the gene is found. Start and End mark the positions in the contig where the gene begins and ends, respectively. GenBank accession is a unique identifier assigned to the chemosensory gene, which can be used to retrieve its sequence from the NCBI GenBank database.

**Table 5: Summary of Ionotropic Receptors (IR)**

| **Gene name** | **Contig** | **Start** | **End** | **Strand** | **Exons** | **Length(aa)** | **GenBank**  **Accession** |
| --- | --- | --- | --- | --- | --- | --- | --- |
| HcamIR1 | contig_426 | 163633 | 168328 | **+** | 6 | 860 | PV030425 |
| HcamIR10 | contig_158 | 49125 | 52933 | **+** | 12 | 912 | PV030426 |
| HcamIR11 | contig_2703 | 1 | 4720 | **+** | 6 | 755 | PV030424 |
| HcamIR12 | contig_1845 | 390367 | 394092 | **+** | 13 | 930 | PV030427 |
| HcamIR13 | contig_714 | 331304 | 333586 | **+** | 6 | 656 | PV030423 |
| HcamIR14 | contig_1809 | 592798 | 601106 | **-** | 15 | 1181 | PV030428 |
| HcamIR15a | contig_71 | 1906681 | 1911199 | **-** | 11 | 672 | PV030429 |
| HcamIR15b | contig_71 | 1906681 | 1911199 | **-** | 11 | 672 | PV030430 |
| HcamIR15c | contig_71 | 1906681 | 1911199 | **-** | 12 | 722 | PV030431 |
| HcamIR16 | contig_2176 | 882922 | 886713 | **-** | 15 | 921 | PV030432 |
| HcamIR17 | contig_1845 | 383714 | 389321 | **-** | 16 | 1133 | PV030433 |
| HcamIR2 | contig_810 | 1195635 | 1198005 | **+** | 5 | 689 | PV030434 |
| HcamIR18 | contig_1721 | 53756 | 57265 | **-** | 10 | 898 | PV030422 |
| HcamIR3 | contig_1809 | 73711 | 76059 | **-** | 8 | 601 | PV030435 |
| HcamIR4 | contig_1049 | 499756 | 502974 | **+** | 6 | 667 | PV030421 |
| HcamIR5 | contig_71 | 1928300 | 1932088 | **+** | 13 | 863 | PV030436 |
| HcamIR6 | contig_2176 | 879084 | 882637 | **-** | 13 | 844 | PV030437 |
| HcamIR7 | contig_2080 | 542885 | 546882 | **-** | 8 | 902 | PV030438 |
| HcamIR8 | contig_1036 | 614949 | 619674 | **-** | 13 | 849 | PV030420 |
| HcamIR9 | contig_966 | 112865 | 117015 | **+** | 12 | 920 | PV030419 |

Gene name represents the identifier assigned based on the evolutionary order among the *H. camelina* IR genes. Length (aa) indicates the number of amino acids in the protein encoded by the gene. Contig refers to the genomic location or sequence identifier where the gene is found. Start and End marks the positions in the contig where the gene begins and ends, respectively. GenBank accession is a unique identifier assigned to the chemosensory gene, which can be used to retrieve its sequence from the NCBI GenBank database.

**Table 6: Summary of Gustatory Receptors (GR)**

| **Gene name** | **Contig** | **Start** | **End** | **Strand** | **Exons** | **Length(aa)** | **Tmms** | **GenBank**  **Accession** |
| --- | --- | --- | --- | --- | --- | --- | --- | --- |
| HcamGR6 | contig_178 | 17965 | 19483 | **+** | 3 | 395 | 8 | PV030412 |
| HcamGR7 | contig_961 | 1646014 | 1648904 | **-** | 7 | 486 | 6 | PV030413 |
| HcamGR3 | contig_1639 | 1795117 | 1796832 | **-** | 7 | 437 | 9 | PV030414 |
| HcamGR1 | contig_150 | 1432610 | 1434208 | **+** | 4 | 457 | 7 | PV030415 |
| HcamGR5 | contig_1660 | 29156 | 31498 | **-** | 6 | 456 | 6 | PV030416 |
| HcamGR4 | contig_150 | 3810166 | 3813597 | **-** | 4 | 445 | 8 | PV030417 |
| HcamGR2 | contig_426 | 1222023 | 1223280 | **-** | 4 | 357 | 5 | PV030418 |

Gene name represents the identifier assigned based on the evolutionary order among the H. camelina GRs genes. Length (aa) indicates the number of amino acids in the protein encoded by the gene. Contig refers to the genomic location or sequence identifier where the gene is found. Start and End mark the positions in the contig where the gene begins and ends, respectively. GenBank accession is a unique identifier assigned to the chemosensory gene, which can be used to retrieve its sequence from the NCBI GenBank database.

**Table 7: Summary of Odorant Receptors (ORs)**

| **Gene name** | **Contig** | **Start** | **End** | **Strand** | **Exons** | **Length(aa)** | **Tmms** | **GenBank**  **Accession** |
| --- | --- | --- | --- | --- | --- | --- | --- | --- |
| HcamOr1 | contig_147 | 1714915 | 1716536 | **-** | 5 | 432 | 5 | PV030453 |
| HcamOrco | contig_71 | 1447114 | 1449077 | **+** | 7 | 476 | 7 | PV030452 |
| HcamOr4a | contig_2520 | 6207 | 7761 | **+** | 4 | 363 | 6 | PV030448 |
| HcamOr4b | contig_2520 | 6207 | 7761 | **+** | 5 | 396 | 6 | PV03044 |
| HcamOr3 | contig_2756 | 161820 | 163512 | **-** | 5 | 407 | 5 | PV030450 |
| HcamOr2 | contig_817 | 98991 | 100320 | **+** | 3 | 385 | 7 | PV030451 |

Gene name represents the identifier assigned based on the evolutionary order among the H. camelina OR genes. Length (aa) indicates the number of amino acids in the protein encoded by the gene. Contig refers to the genomic location or sequence identifier where the gene is found. Start and End mark the positions in the contig where the gene begins and ends, respectively. GenBank accession is a unique identifier assigned to the chemosensory gene, which can be used to retrieve its sequence from the NCBI GenBank database.

**Table 8: Summary of Odorant Binding Proteins (OBPs)**

| **Gene name** | **Contig** | **Start** | **End** | **Strand** | **Exons** | **Length(aa)** | **GenBank**  **Accession** |
| --- | --- | --- | --- | --- | --- | --- | --- |
| HcamOBP6 | contig_214 | 3510456 | 3511030 | **+** | 2 | 147 | PV030439 |
| HcamOBP5 | contig_178 | 107360 | 107933 | **+** | 2 | 143 | PV030440 |
| HcamOBP4 | contig_147 | 1263236 | 1263960 | **+** | 5 | 143 | PV030441 |
| HcamOBP7 | contig_792 | 316356 | 317070 | **-** | 4 | 162 | PV030447 |
| HcamOBP3 | contig_1370 | 59780 | 60282 | **-** | 2 | 146 | PV030442 |
| HcamOBP2 | contig_147 | 723942 | 724678 | **+** | 5 | 157 | PV030443 |
| HcamOBP9 | contig_2118 | 24171 | 24638 | **+** | 2 | 103 | PV030444 |
| HcamOBP8 | contig_1194 | 28280 | 28775 | **-** | 2 | 139 | PV030445 |
| HcamOBP1 | contig_2388 | 131941 | 132970 | **-** | 2 | 157 | PV030446 |

Gene name represents the identifier assigned based on the evolutionary order among the *H. camelina* OBP genes. Length (aa) indicates the number of amino acids in the protein encoded by the gene. Contig refers to the genomic location or sequence identifier where the gene is found. Start and End mark the positions in the contig where the gene begins and ends, respectively. GenBank accession is a unique identifier assigned to the chemosensory gene, which can be used to retrieve its sequence from the NCBI GenBank database.

**Table 9: Summary of Sensory Neuron Membrane Protein (SNMPs)**

| **Gene name** | **Contig** | **Start** | **End** | **Strand** | **Exons** | **Length(aa)** | **TMM** | **GenBank**  **Accession** |
| --- | --- | --- | --- | --- | --- | --- | --- | --- |
| HcamSNMP1 | contig_184 | 2495647 | 2505062 | **-** | 9 | 565 | 2 | PV030454 |

Gene name represents the identifier assigned based on the evolutionary order among the *H. camelina* SNMP genes. Length (aa) indicates the number of amino acids in the protein encoded by the gene. Contig refers to the genomic location or sequence identifier where the gene is found. Start and End mark the positions in the contig where the gene begins and ends, respectively. GenBank accession is a unique identifier assigned to the chemosensory gene, which can be used to retrieve its sequence from the NCBI GenBank database.
